# Supplementary material for: Remdesivir Strongly Binds to RNA-Dependent RNA Polymerase, Membrane Protein, and Main Protease of SARS-CoV-2: Indication From Molecular Modeling and Simulations
Source: PubMed Central journal article supplement (PMC8293383; doi:10.3389/fphar.2021.710778), 2021-07-07
Supplement: DataSheet1.pdf [file DataSheet1.pdf]

# Remdesivir Strongly Binds to RNA-Dependent RNA Polymerase, Membrane protein, and Main Protease of SARS-CoV-2: Indication from Molecular Modelling and Simulations

Faez Iqbal Khan<sup>1#</sup>, Tongzhou Kang<sup>1#</sup>, Haider Ali<sup>2</sup>, and Dakun Lai<sup>1,\*</sup>

<sup>1</sup>*School of Electronic Science and Engineering, University of Electronic Science and Technology of China, Chengdu, Sichuan, China.*

<sup>2</sup>*Faculty of medicine, International Ala-too University, Bishkek 720048, Kyrgyzstan.*

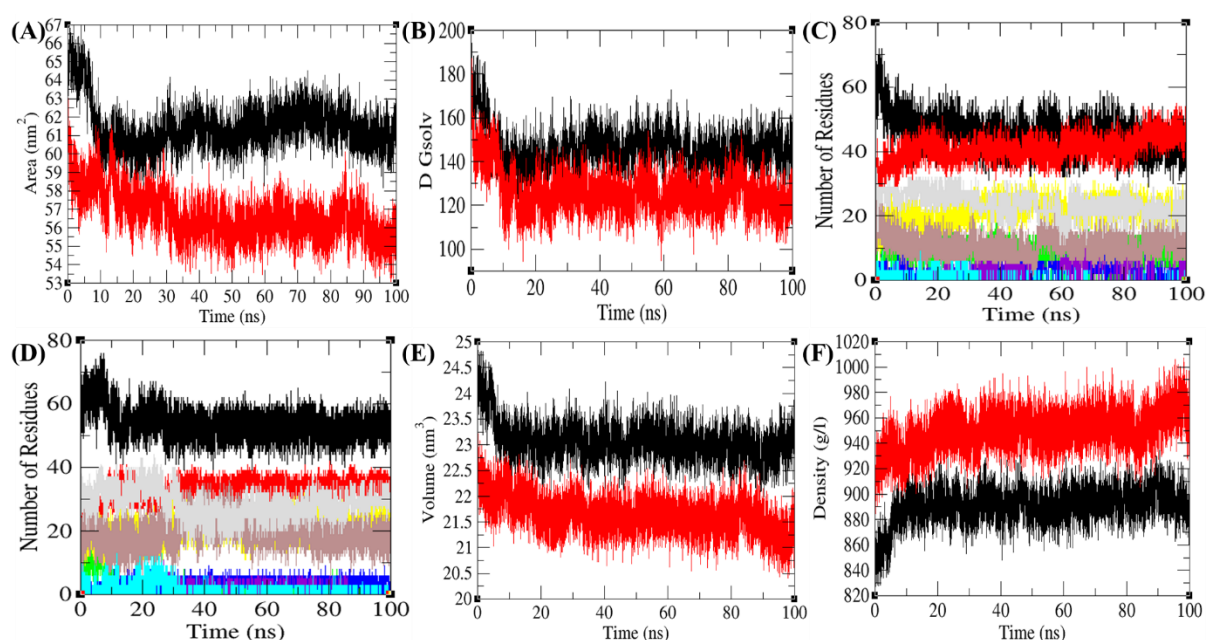

**Figure S1.** The secondary structure plot of CTD. The SASA plot of (A) CTD (black) and (B) CTD-remdesivir (red). The graphical representation indicating structural elements present in (C) CTD, and (D) CTD-remdesivir. The secondary structure elements represent  $\alpha$ -helices,  $\beta$ -sheets,  $\beta$ -bridge, and turns. Each structural element has been represented by different colour such as black (overall structure), red (coil), green ( $\beta$ -sheet), blue ( $\beta$ -bridge), yellow (bend), brown (turn), grey ( $\alpha$ -helix), and cyan ( $\beta$ -helix), respectively. (E) The structural volume, and (F) the density of CTD (black) and CTD-remdesivir (red) calculated during MD simulations.

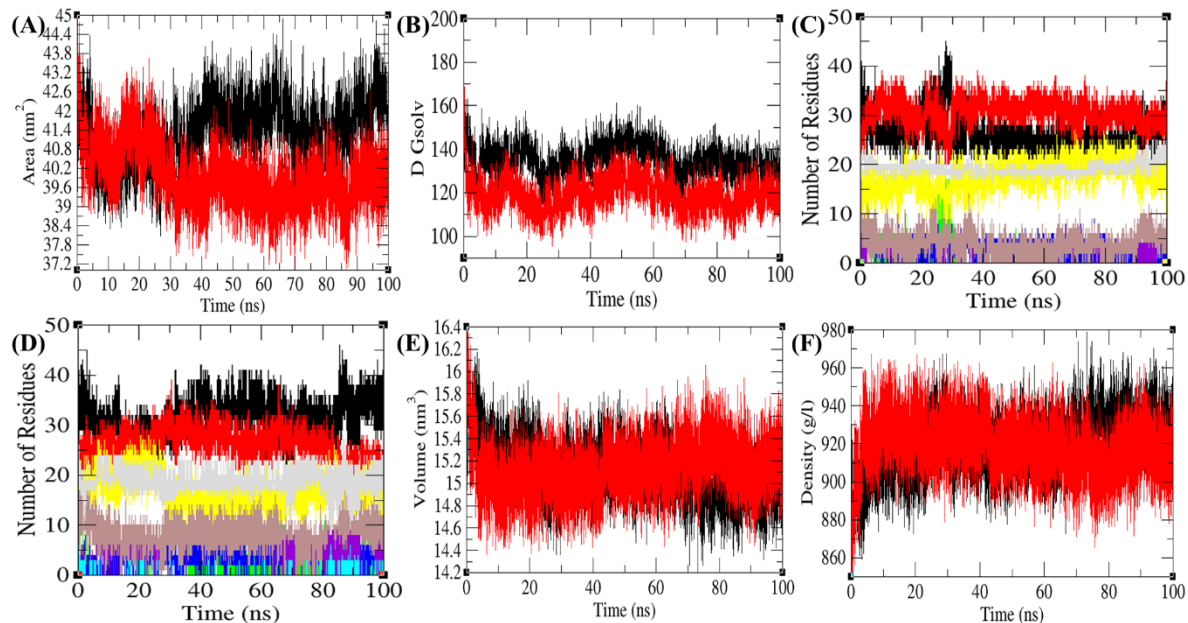

**Figure S2. The secondary structure plot of Eprotein.** The SASA plot of (A) Eprotein (black) and (B) Eprotein -remdesivir (red). The graphical representation indicating structural elements present in (C) Eprotein, and (D) Eprotein -remdesivir. (E) The structural volume and (F) the density of Eprotein (black) and Eprotein -remdesivir (red) calculated during MD simulations. The colour of the secondary structure plot has the same meaning as in the previous figure.

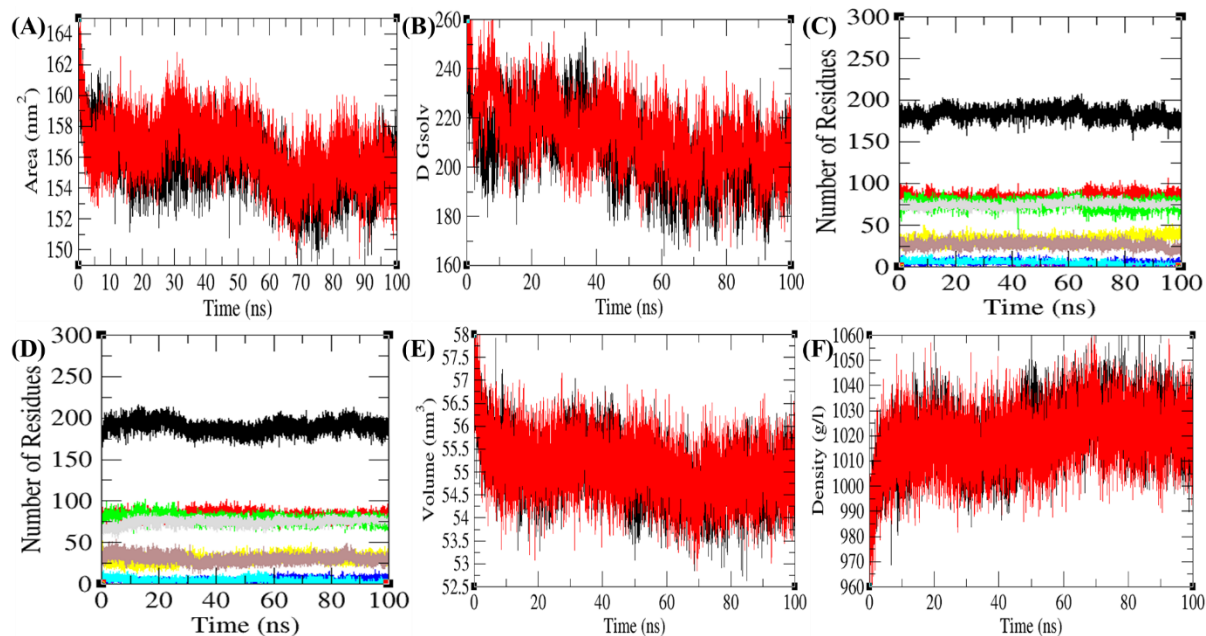

**Figure S3. The secondary structure plot of Mprotease.** The SASA plot of (A) Mprotease (black) and (B) Mprotease -remdesivir (red). The graphical representation indicating structural elements present in (C) Mprotease, and (D) Mprotease -remdesivir. (E) The structural volume and (F) the density of Mprotease (black) and Mprotease -remdesivir (red) calculated during MD simulations. The colour of the secondary structure plot has the same meaning as in the previous figure.

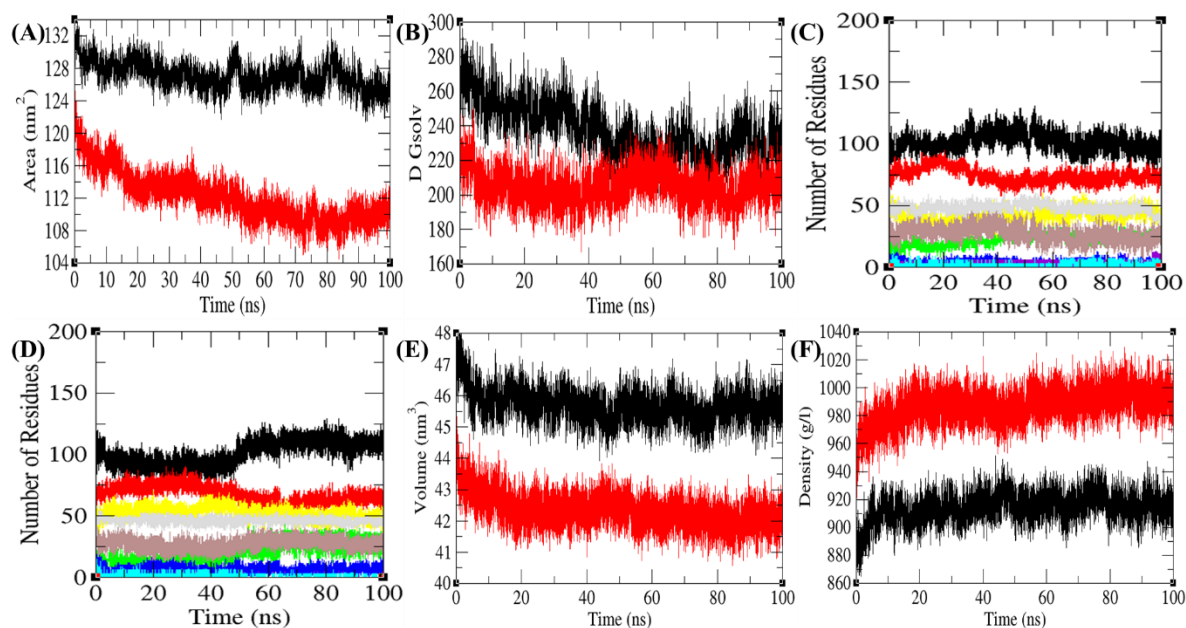

**Figure S4. The secondary structure plot of Mprotein.** The SASA plot of (A) Mprotein (black) and (B) Mprotein -remdesivir (red). The graphical representation indicating structural elements present in (C) Mprotein, and (D) Mprotein -remdesivir. (E) The structural volume and (F) the density of Mprotein (black) and Mprotein-remdesivir (red) calculated during MD simulations. The colour of the secondary structure plot has the same meaning as in the previous figure.

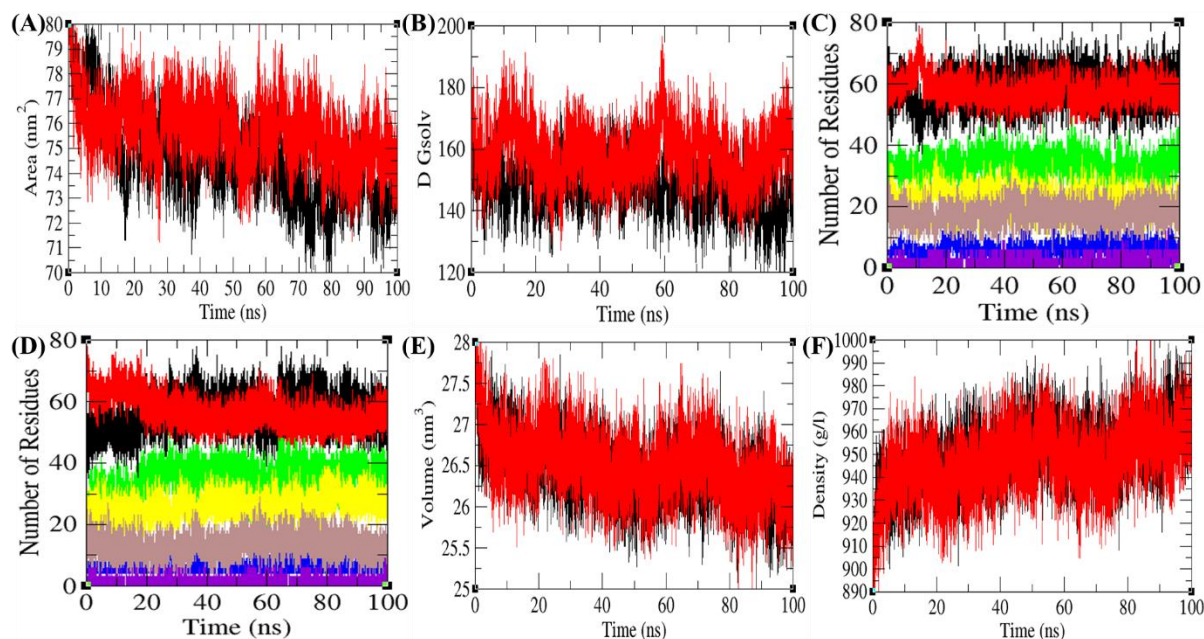

**Figure S5. The secondary structure plot of NTD.** The SASA plot of (A) NTD (black) and (B) NTD -remdesivir (red). The graphical representation indicating structural elements present in (C) NTD, and (D) NTD -remdesivir. (E) The structural volume and (F) the density of NTD (black) and NTD -remdesivir (red) calculated during MD simulations. The colour of the secondary structure plot has the same meaning as in the previous figure.

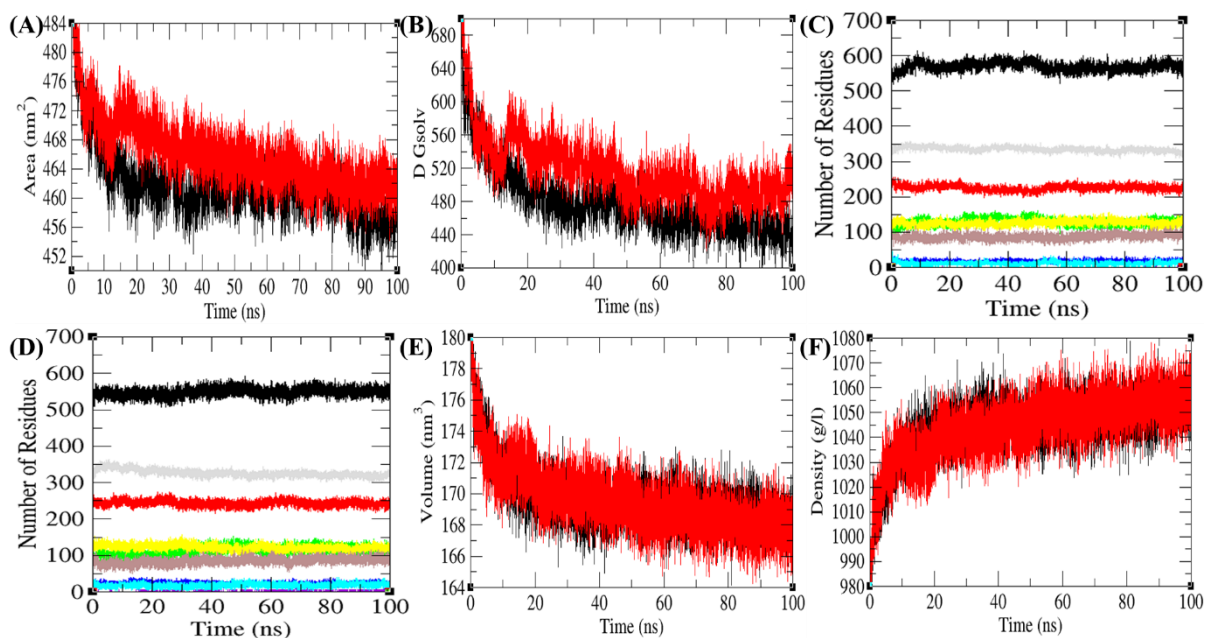

**Figure S6. The secondary structure plot of RDRP.** The SASA plot of (A) RDRP (black) and (B) RDRP -remdesivir (red). The graphical representation indicating structural elements present in (C) RDRP, and (D) RDRP -remdesivir. (E) The structural volume and (F) the density of RDRP (black) and RDRP-remdesivir (red) calculated during MD simulations. The colour of the secondary structure plot has the same meaning as in the previous figure.

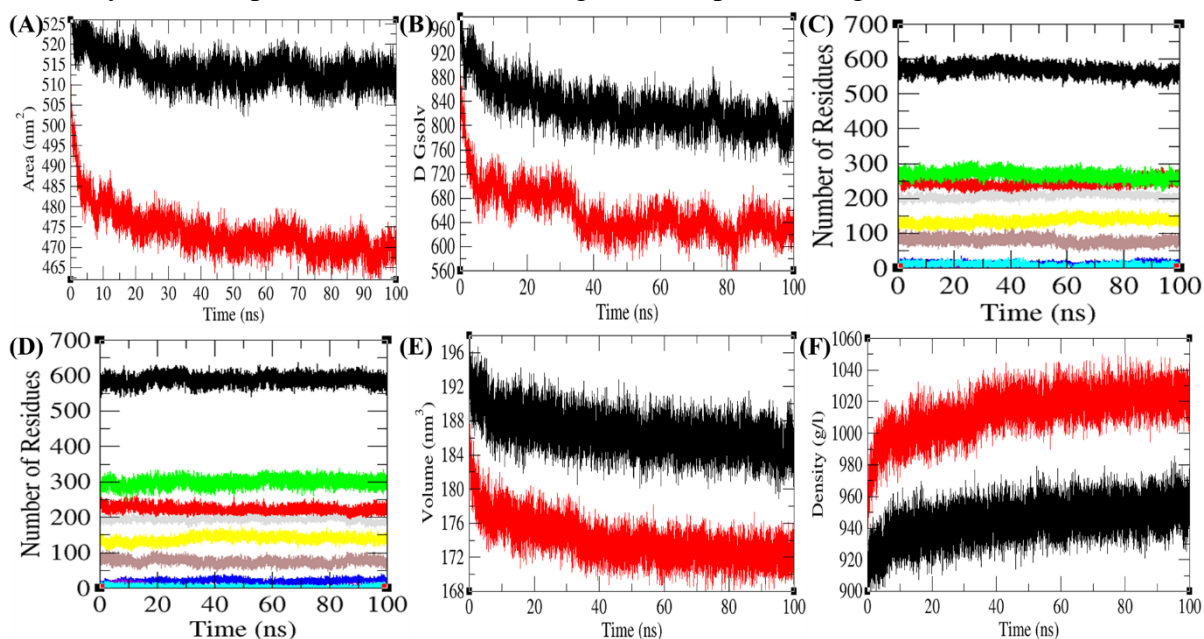

**Figure S7. The secondary structure plot of Sprotein.** The SASA plot of (A) Sprotein (black) and (B) Sprotein -remdesivir (red). The graphical representation indicating structural elements present in (C) Sprotein, and (D) Sprotein -remdesivir. (E) The structural volume and (F) the density of Sprotein (black) and Sprotein-remdesivir (red) calculated during MD simulations. The colour of the secondary structure plot has the same meaning as in the previous figure.
